# Supplementary material for: Gut Microbial Composition and Predicted Functions Are Not Associated with Feather Pecking and Antagonistic Behavior in Laying Hens
Source: PubMed Central journal article supplement (PMC8001194; doi:10.3390/life11030235), 2021-03-12
Supplement: life-11-00235-s001.pdf [file life-11-00235-s001.pdf]

# Gut Microbial Composition and Predicted Functions are not Associated with Feather Pecking and Antagonistic Behavior in Laying Hens

Daniel Borda-Molina<sup>1,†</sup>, Hanna Iffland<sup>1,†</sup>, Markus Schmid<sup>1</sup>, Regina Müller<sup>1</sup>, Svenja Schad<sup>1</sup>, Jana Seifert<sup>1</sup>, Jens Tetens<sup>2,3</sup>, Werner Bessei<sup>1</sup>, Jörn Bennewitz<sup>1</sup> and Amélia Camarinha-Silva<sup>1,\*</sup>

## Supplementary Material

### 1 Supplementary Figures

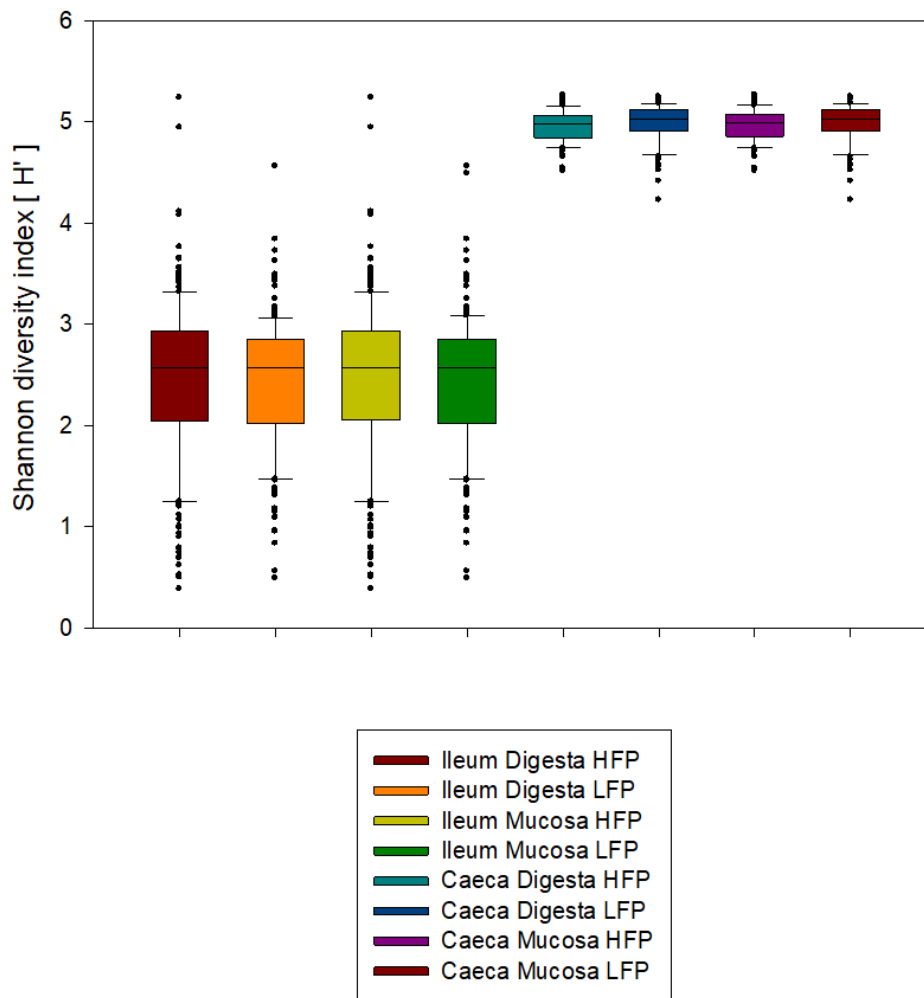

**Figure 1.** Shannon diversity index for the ileum and caeca in the mucosa and digesta samples coming from the high (HFP) and low feather pecking (LFP) laying hen lines.

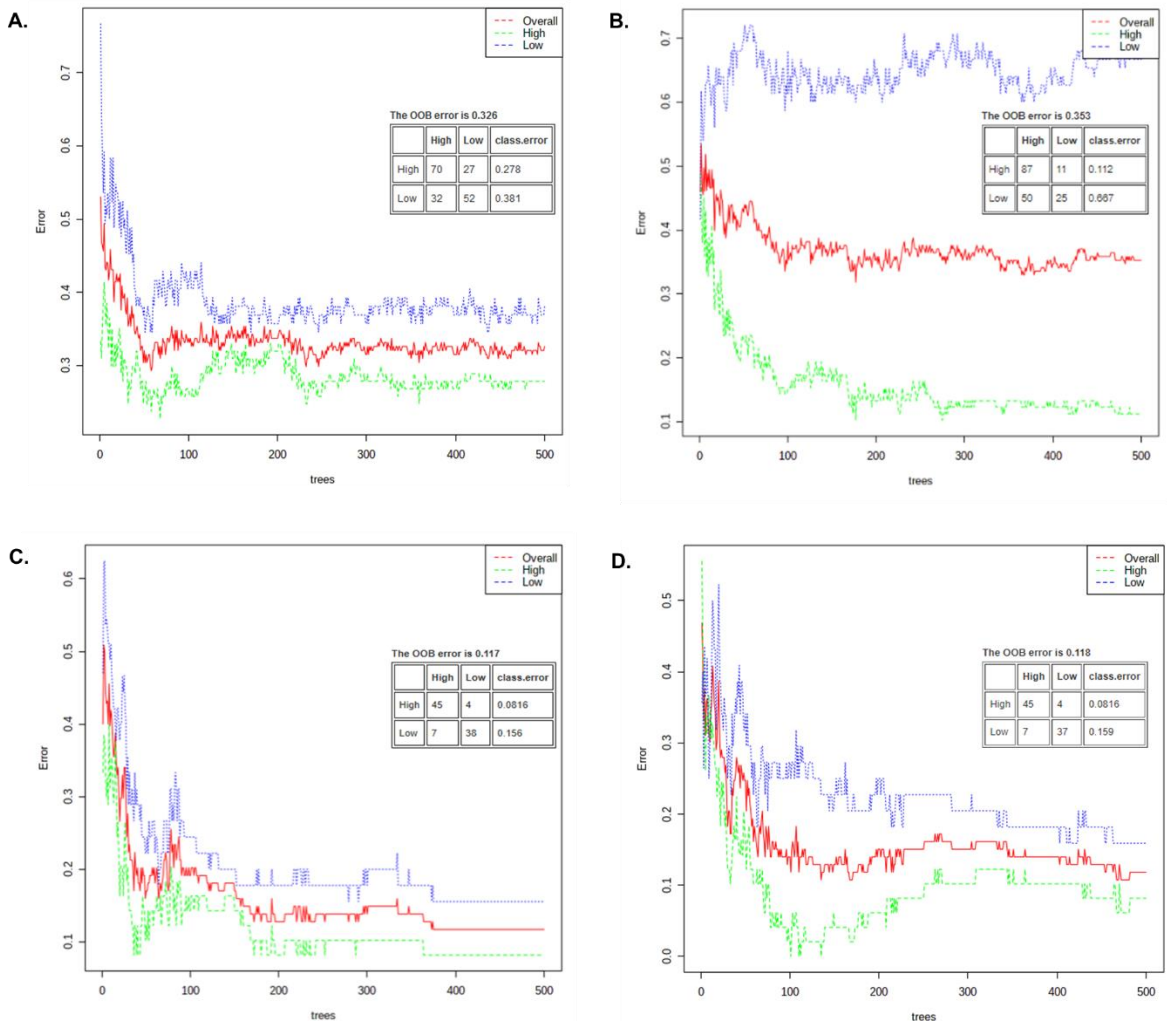

**Figure S2.** Random forest analysis based on the estimation for the out of the error bag (OOB) (y-axis) with a bootstrap of 500 created trees (x-axis), based on abundance information of operational taxonomic units at genus level data in ileum digesta (A), ileum mucosa (B), caeca digesta (C), and caeca mucosa (D). The table explained the classification performance for the high feather pecking line (green), the low feather pecking line (blue), and across both lines (red).

# Amino acid metabolism

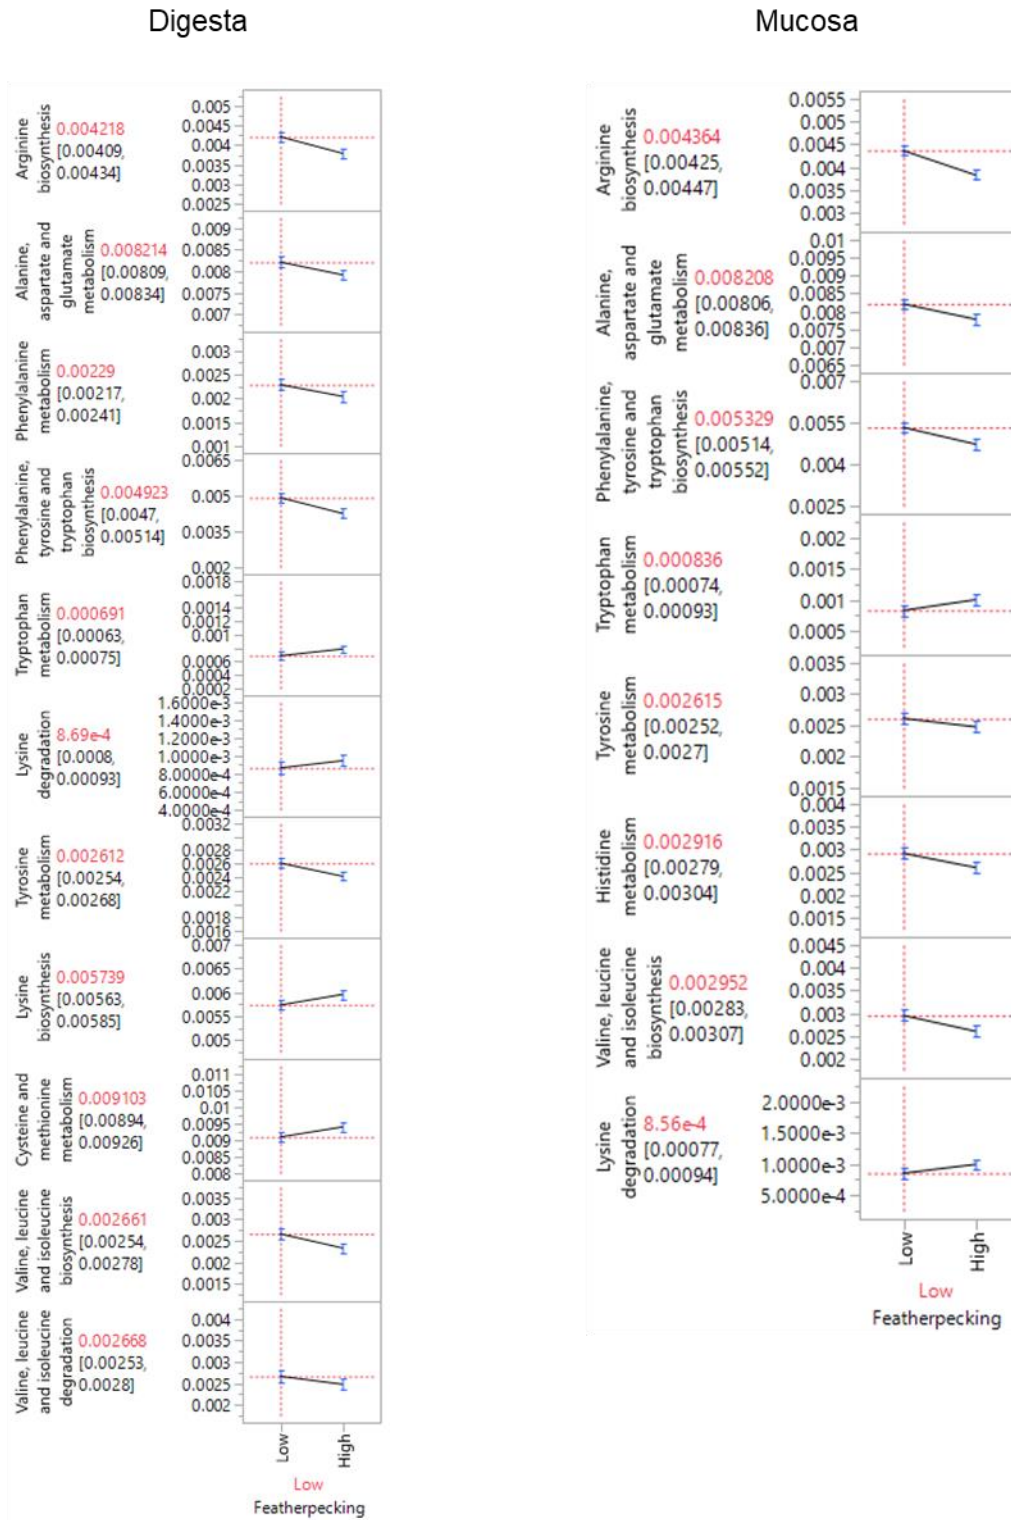

**Figure S3.** Functional predictions for the caeca digesta and mucosa in the subcategory amino acid metabolism in the high and low feather pecking laying hen lines. The mean values of the measures are highlighted in red. The range of the observed values is given in brackets.

# Carbohydrate metabolism

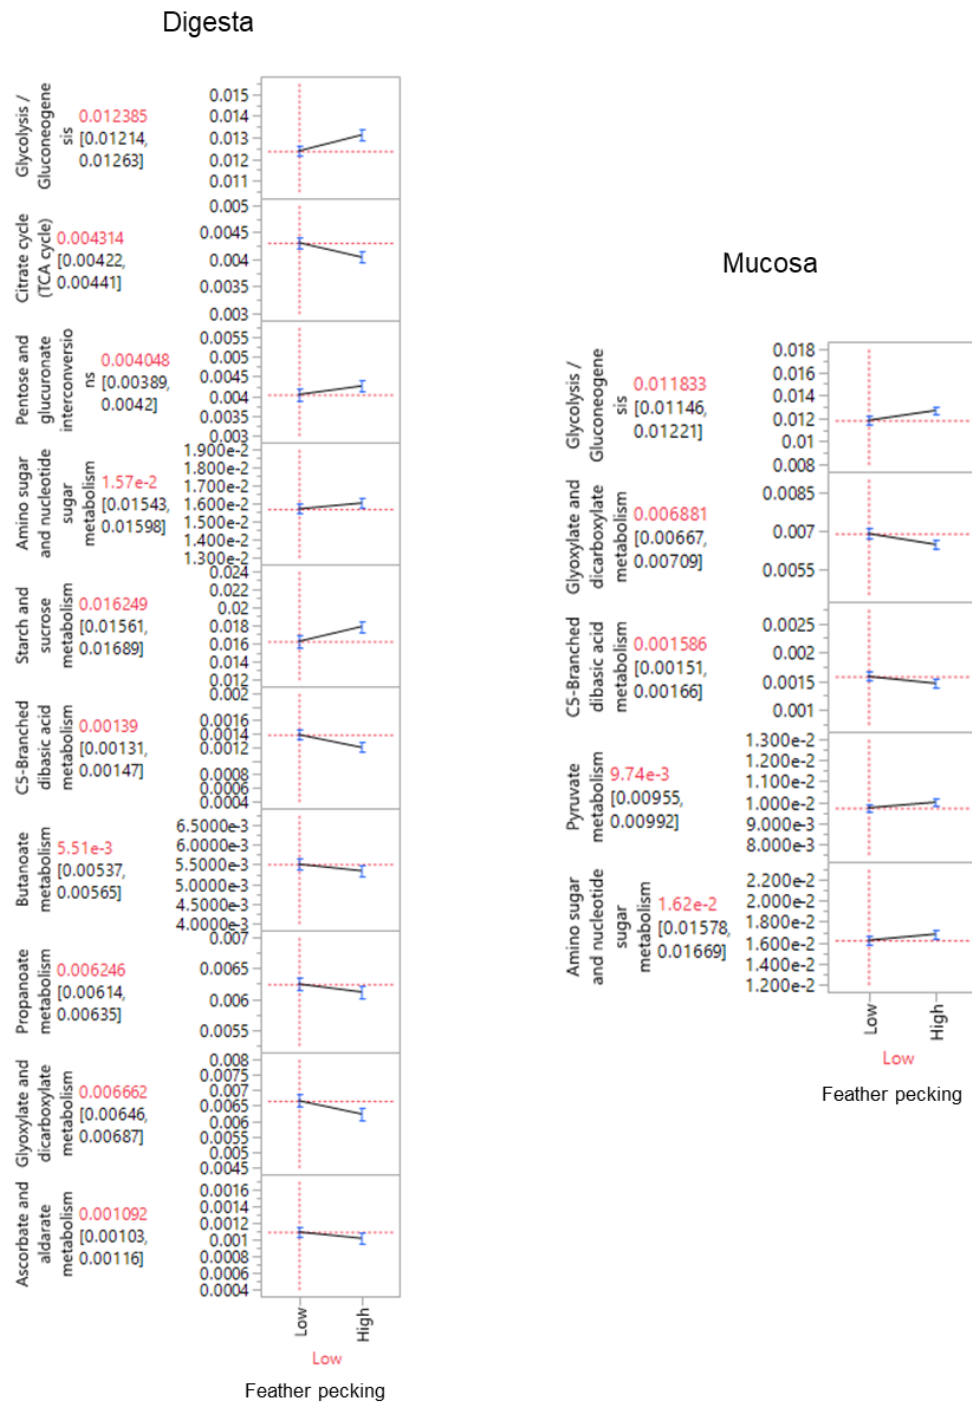

**Figure S4.** Functional predictions for the caeca digesta and mucosa in the subcategory carbohydrate metabolism in the high and low feather pecking laying hen lines. The mean values of the measures are highlighted in red. The range of the observed values is given in brackets.

# Energy metabolism

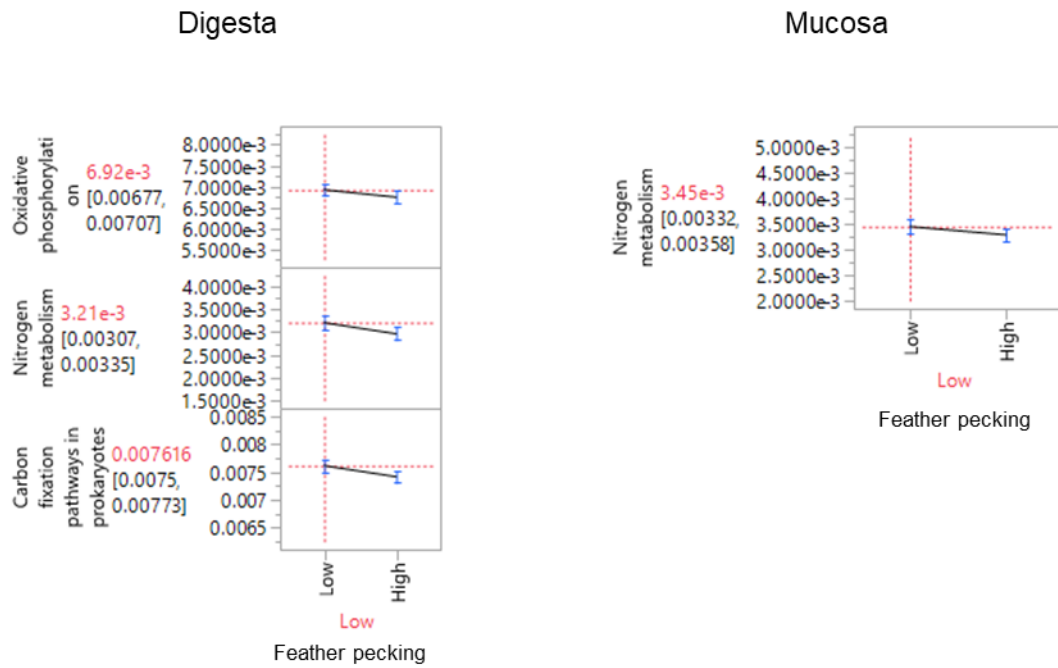

**Figure S5.** Functional predictions for the caeca digesta and mucosa in the subcategory energy metabolism in the high and low feather pecking laying hen lines. The mean values of the measures are highlighted in red. The range of the observed values is given in brackets.

# Membrane transport

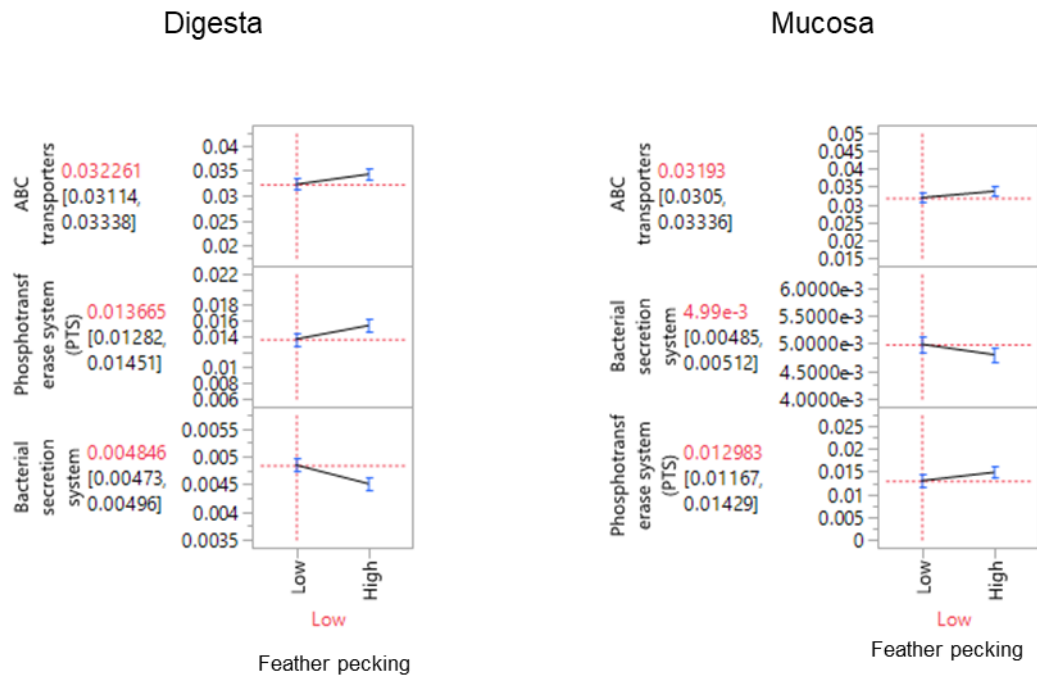

**Figure S6.** Functional predictions for the caeca digesta and mucosa in the subcategory membrane transport in the high and low feather pecking laying hen lines. The mean values of the measures are highlighted in red. The range of the observed values is given in brackets.

## Biosynthesis of other secondary metabolites

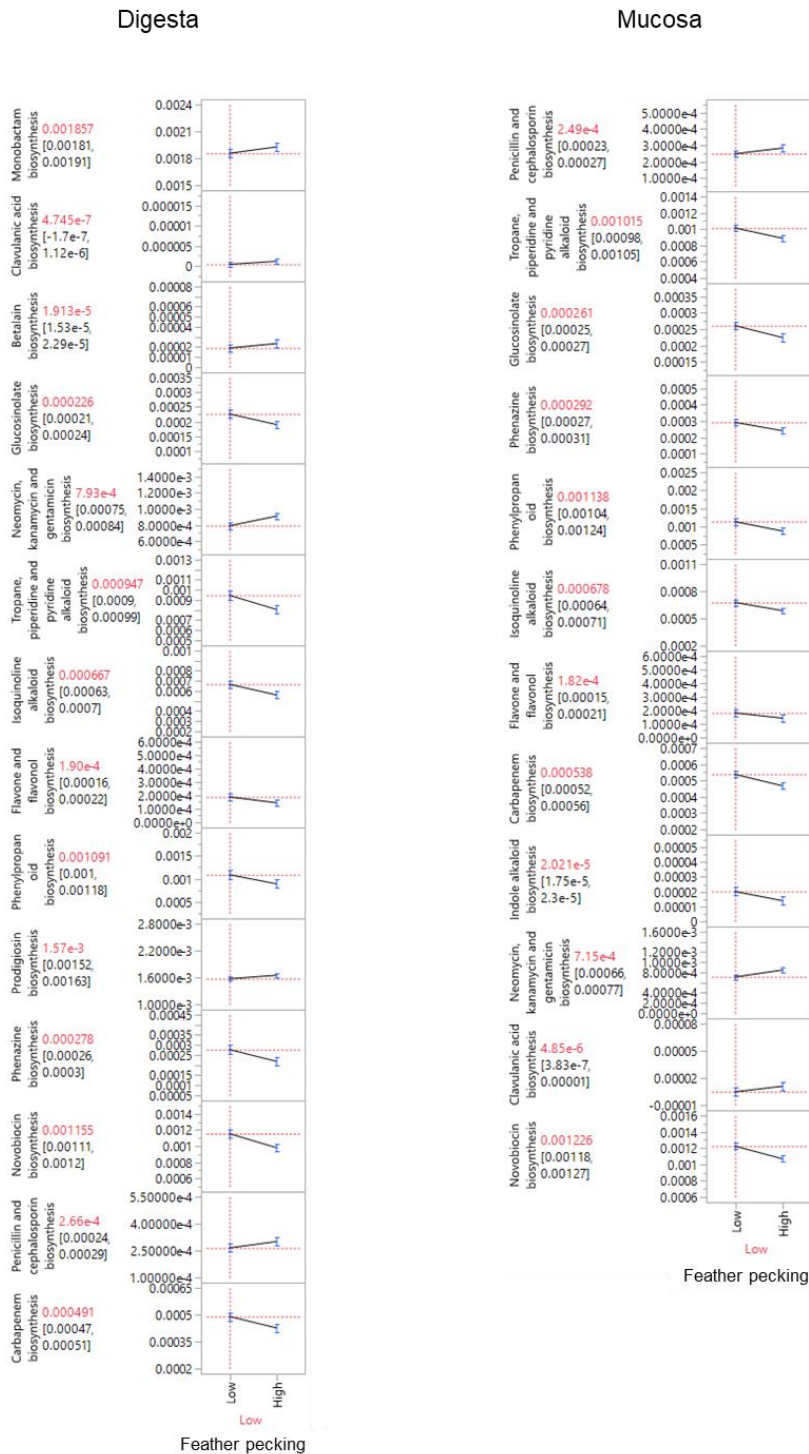

**Figure S7.** Functional predictions for the caeca digesta and mucosa in the subcategory biosynthesis of other secondary metabolites in the high and low feather pecking laying hen lines. The mean values of the measures are highlighted in red. The range of the observed values is given in brackets.



## Lipid metabolism

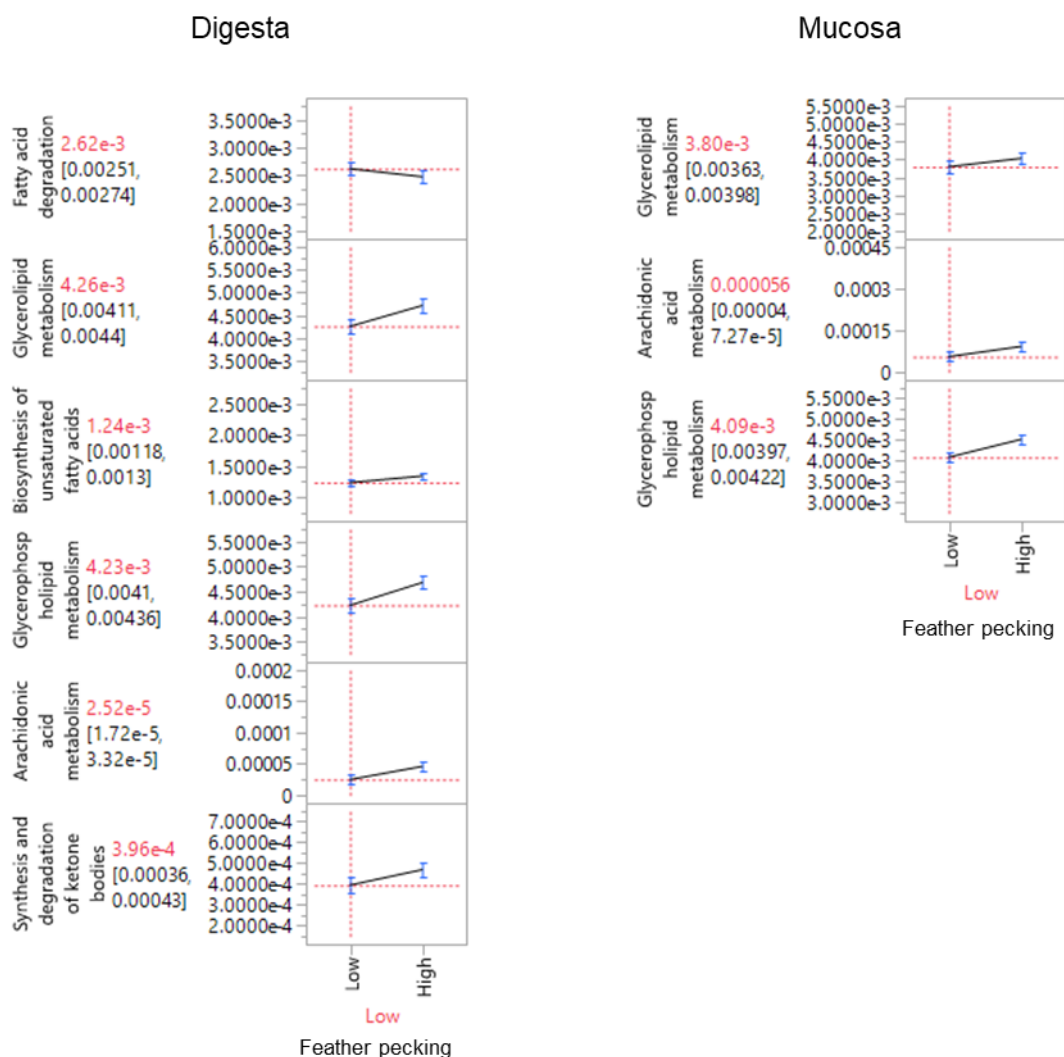

**Figure S8.** Functional predictions for the caeca digesta and mucosa in the subcategory lipid metabolism in the high and low feather pecking laying hen lines. The mean values of the measures are highlighted in red. The range of the observed values is given in brackets.



## Cell motility

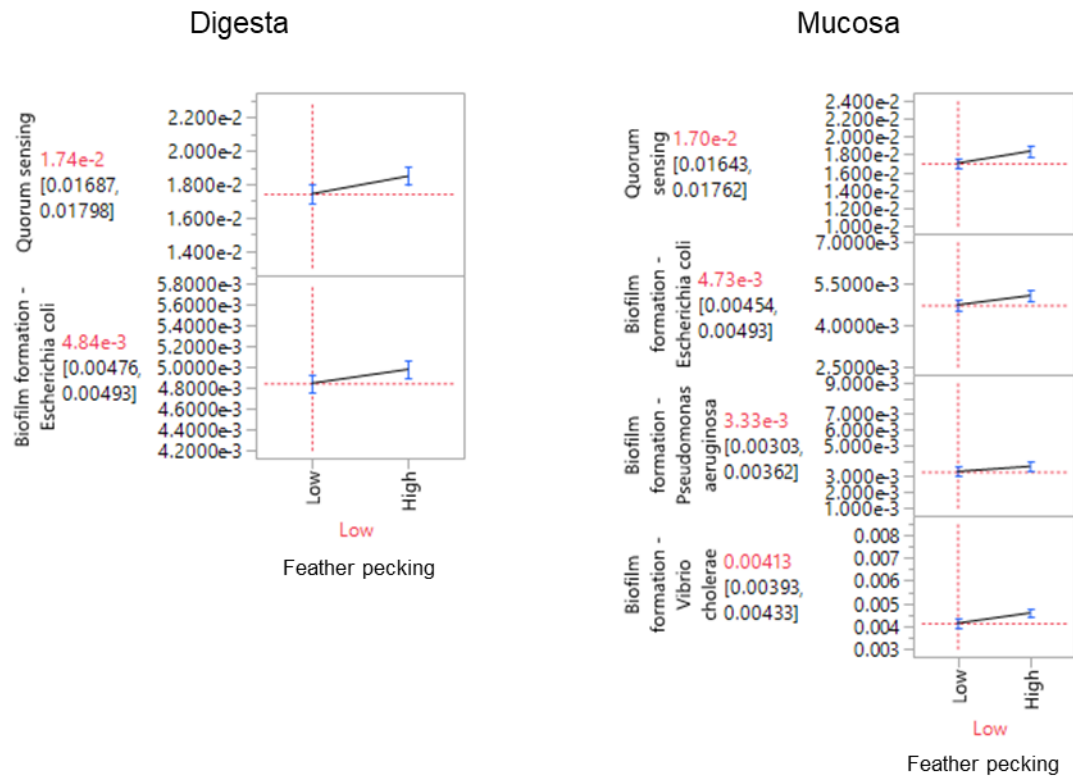

**Figure S9.** Functional predictions for the caeca digesta and mucosa in the subcategory cell motility in the high and low feather pecking laying hen lines. The mean values of the measures are highlighted in red. The range of the observed values is given in brackets.

## 2 Supplementary Tables

**Table 1. A-E.** Permanova test for the 16S rRNA gene identified bacterial species dataset obtained from the gut microbiome samples of the mucosa and digesta (type) taken either from the ileum or caeca (section) from the high and low feather pecking laying hen lines (line).

### A. Overall test

| PERMANOVA table of results |     |          |          |          |         |       | Unique |
|----------------------------|-----|----------|----------|----------|---------|-------|--------|
| Source                     | df  | SS       | MS       | Pseudo-F | P(perm) | perms |        |
| Type                       | 1   | 89289    | 89289    | 66.759   | 0.0001  | 9931  |        |
| Section                    | 1   | 6.95E+09 | 6.95E+09 | 519.66   | 0.0001  | 9936  |        |
| Line                       | 1   | 5954.3   | 5954.3   | 44.519   | 0.0033  | 9938  |        |
| Type x Section             | 1   | 83185    | 83185    | 62.195   | 0.0001  | 9935  |        |
| Type x Line                | 1   | 2197.4   | 2197.4   | 1.643    | 0.1369  | 9924  |        |
| Section x Line             | 1   | 6061.5   | 6061.5   | 45.321   | 0.0033  | 9940  |        |
| Type x Section x Line      | 1   | 1981.8   | 1981.8   | 14.817   | 0.171   | 9936  |        |
| Residual                   | 533 | 7.13E+09 | 1337.5   |          |         |       |        |
| Total                      | 540 | 1.65E+09 |          |          |         |       |        |

B. Ileum digesta

| PERMANOVA table of results |     |          |        |          |         |              |
|----------------------------|-----|----------|--------|----------|---------|--------------|
| Source                     | df  | SS       | MS     | Pseudo-F | P(perm) | Unique perms |
| Line                       | 1   | 4002.1   | 4002.1 | 3.1189   | 0.0046  | 9937         |
| Residual                   | 179 | 2.2968E5 | 1283.2 |          |         |              |
| Total                      | 180 | 2.33E+05 |        |          |         |              |

C. Ileum mucosa

| PERMANOVA table of results |     |          |        |          |         |              |
|----------------------------|-----|----------|--------|----------|---------|--------------|
| Source                     | df  | SS       | MS     | Pseudo-F | P(perm) | Unique perms |
| Line                       | 1   | 2803.1   | 2803.1 | 1.4978   | 0.1657  | 9945         |
| Residual                   | 171 | 3.2003E5 | 1871.5 |          |         |              |
| Total                      | 172 | 3.2283E5 |        |          |         |              |

D. Caecum digesta

| PERMANOVA table of results |    |        |        |          |         |              |
|----------------------------|----|--------|--------|----------|---------|--------------|
| Source                     | df | SS     | MS     | Pseudo-F | P(perm) | Unique perms |
| Line                       | 1  | 4087.4 | 4087.4 | 4.8409   | 0.0001  | 9903         |
| Residual                   | 92 | 77680  | 844.35 |          |         |              |
| Total                      | 93 | 81768  |        |          |         |              |

E. Caecum mucosa

| PERMANOVA table of results |    |        |        |          |         |              |
|----------------------------|----|--------|--------|----------|---------|--------------|
| Source                     | df | SS     | MS     | Pseudo-F | P(perm) | Unique perms |
| Line                       | 1  | 4714.3 | 4714.3 | 5.0187   | 0.0001  | 9895         |
| Residual                   | 91 | 85480  | 939.34 |          |         |              |
| Total                      | 92 | 90194  |        |          |         |              |

**Table 2. A-E.** Permanova test for the predicted functions based on 16S rRNA gene identified bacterial species obtained from the gut microbiome samples of the mucosa and digesta (type) taken either from the ileum or caeca (section) from the high and low feather pecking laying hen lines (line).

A. Overall test

---

**PERMANOVA table of results**

---

| Source                | df  | SS     | MS     | Pseudo-F | P(perm) | Unique perms |
|-----------------------|-----|--------|--------|----------|---------|--------------|
| Type                  | 1   | 70.081 | 70.081 | 3.9665   | 0.0147  | 9940         |
| Section               | 1   | 464    | 464    | 26.262   | 0.0001  | 9948         |
| Line                  | 1   | 5130.5 | 5130.5 | 290.38   | 0.0001  | 9930         |
| Type x Section        | 1   | 13.447 | 13.447 | 0.76107  | 0.4906  | 9948         |
| Type x Line           | 1   | 150.65 | 150.65 | 8.5266   | 0.0001  | 9944         |
| Section x Line        | 1   | 26.922 | 26.922 | 1.5238   | 0.1796  | 9950         |
| Type x Section x Line | 1   | 11.113 | 11.113 | 0.629    | 0.5837  | 9931         |
| Residual              | 533 | 9417.2 | 17.668 |          |         |              |
| Total                 | 540 | 15268  |        |          |         |              |

---

## B. Ileum digesta

---

**PERMANOVA table of results**

---

| Source   | df  | SS     | MS     | Pseudo-F | P(perm) | Unique perms |
|----------|-----|--------|--------|----------|---------|--------------|
| Line     | 1   | 27.371 | 27.371 | 1.9859   | 0.1193  | 9949         |
| Residual | 179 | 2467.1 | 13.783 |          |         |              |
| Total    | 180 | 2494.4 |        |          |         |              |

---

## C. Ileum mucosa

---

**PERMANOVA table of results**

---

| Source   | df  | SS     | MS     | Pseudo-F | P(perm) | Unique perms |
|----------|-----|--------|--------|----------|---------|--------------|
| Line     | 1   | 41.369 | 41.369 | 1.6259   | 0.1463  | 9946         |
| Residual | 171 | 4351   | 25.444 |          |         |              |
| Total    | 172 | 4392.3 |        |          |         |              |

---

## D. Caecum digesta

---

**PERMANOVA table of results**

---

| Source   | df | SS     | MS     | Pseudo-F | P(perm) | Unique perms |
|----------|----|--------|--------|----------|---------|--------------|
| Line     | 1  | 77.404 | 77.404 | 6.7559   | 0.0015  | 9952         |
| Residual | 92 | 1054.1 | 11.457 |          |         |              |
| Total    | 93 | 1131.5 |        |          |         |              |

---

## E. Caecum mucosa

---

**PERMANOVA table of results**

---

| Source   | df | SS     | MS     | Pseudo-F | P(perm) | Unique perms |
|----------|----|--------|--------|----------|---------|--------------|
| Line     | 1  | 73.802 | 73.802 | 4.3467   | 0.0009  | 9945         |
| Residual | 91 | 1545.1 | 16.979 |          |         |              |
| Total    | 92 | 1618.9 |        |          |         |              |

---
